## Relationship between understanding of gender and LGBTQ and brain health with a focus on the triple network

Taiko Otsuka<sup>1\*</sup>, Keisuke Kokubun<sup>1</sup>, Maya Okamoto<sup>1</sup>, and Yoshinori Yamakawa<sup>1,2,3,4,5</sup>

<sup>1</sup>Graduate School of Management, Kyoto University, Kyoto, Japan

<sup>2</sup>Institute of Innovative Research, Tokyo Institute of Technology, Meguro, Tokyo, Japan

<sup>3</sup>ImPACT Program of Council for Science, Technology and Innovation (Cabinet Office, Government of Japan), Chiyoda, Tokyo, Japan

<sup>4</sup>Office for Academic and Industrial Innovation, Kobe University, Kobe, Japan

<sup>5</sup>Brain Impact, Kyoto, Japan.

\*Email: [otsuka.taiko.8p@kyoto-u.ac.jp](mailto:otsuka.taiko.8p@kyoto-u.ac.jp)

### Summary

Various studies have been conducted mainly in the fields of social sciences to address the lack of understanding of diversity in Japan regarding gender, LGBTQ, etc., but little progress has been made in promoting diversity in society. In this study, we aimed to clarify the specific brain states of people who have a high understanding of diversity (gender and LGBTQ) using the gray matter brain healthcare quotient (GM-BHQ), a brain health index obtained by MRI image analysis, and the results of a psychological questionnaire on diversity. As a result of the analysis, the GM-BHQ of the Central Executive Network (CEN) tended to be significantly higher than the estimated values from age, gender, and BMI in the group with a high understanding of gender equality. GM-BHQ of the Salience Network (SN) also tended to be relatively high. In addition, the GM-BHQ of SN, default mode network (DMN), and CEN, as well as whole brain GM-BHQ were significantly higher among those with a high understanding of LGBTQ than the estimated values. These results suggest that understanding diversity requires a healthy brain centered on the triple network that governs rational judgment, emotional adjustment, recognition of others, self-recognition, and value judgment of behavior.

### Introduction

Japan ranks 115th out of 146 countries (2022) in the "Gender Gap Index" released annually by the World Economic Forum, the lowest level among developed countries. Also, among Asian countries, the results were lower than those of South Korea, China, and ASEAN countries. This lack of diversity in Japanese society is viewed as a problem in the international community. In addition, Japan is the only G7 country that does not give legal rights to same-sex couples as a country and does not have anti-discrimination provisions regarding LGBTQ. Therefore, attention is focused on discussions at the G7 summit to be held in Japan in 2023. In response to this trend, the Liberal Democratic Party approved the "LGBT Understanding Promotion Bill" in May 2023, but the wording of the original bill has been revised in a

rather conservative way. This is seen as a symbolic event that shows that the nation is not yet mature enough to accept diversity.

There have been many discussions on how to accept diversity in the social sciences such as economics and sociology. On the other hand, in the field of brain science, research on the differences in brain structure and function between men and women and LGBTQ people has been actively conducted (eg García, 2021; Lanz and Brown, 2019). In contrast, little research has been done on what the brains of people who accept such diversity are like. However, compassion is necessary to realize a society in which women and LGBTQ people are active, and compassion is said to be the ability to empathize with other people's suffering (Rodríguez-Nieto et al., 2022). Therefore, it is not impossible to hypothesize and analyze the relationship between brain health and understanding of diversity by referring to the mechanisms of empathy that have been dealt with in the field of brain science. Here, essential to dealing with empathy is the triple network model (Menon, 2019), which consists of three networks: the Salience Network (SN), the Central Executive Network (CEN), and the Default Mode Network. (DMN).

Of these, the CEN, composed of the dorsolateral prefrontal cortex and the posterior parietal cortex, is important for the active retention and manipulation of information in working memory, attention, problem-solving, decision-making, and self-awareness (Fox et al., 2007; Goldberg et al., 2006; Koechlin and Summerfield, 2007; Miller and Cohen, 2001; Owen et al., 2005; Smith and Jonides, 1998; Wager and Smith, 2003). The SN is also a network that includes the ventrolateral prefrontal cortex (VLPFC) and the anterior insula (collectively referred to as the frontal insular cortex FIC) and the anterior cingulate cortex (ACC) (Seeley et al., 2010), responding to subjective degrees of salience, whether cognitive, homeostatic, or emotional (Goulden et al., 2014). The SN also acts as a switch between the CEN and the DMN, inhibiting the latter and activating the former when a salient stimulus or cognitive task is at hand, a process essential for attention and flexible cognitive control (Cai et al., 2015; Chen et al., 2015; Ham et al., 2013; Menon and Uddin, 2010; Sridharan et al., 2008; Uddin, 2015).

On the other hand, the DMN includes the medial posterior cortex, including the posterior cingulate cortex (PCC) and part of the frontal bone, the medial prefrontal cortex (MPFC), and the posterior temporal region around the temporoparietal junction (TPJ), including the inferior parietal lobule (IPL) (Andrews-Hanna et al., 2010; Buckner et al., 2008; Shulman et al., 1997). The DMN is preferentially activated when the individual is not focused on the external environment (Buckner et al., 2008) and is involved in various areas of cognitive and social processing. That is, the medial prefrontal cortex (MPFC) plays an important role in the social understanding of others, and the connections between the anterior MPFC (aMPFC) and the posterior and anterior cingulate cortices primarily contribute to self-other discrimination. On the other hand, the relationship between the dorsal MPFC (dMPFC) and the temporoparietal junction (TPJ) is mainly related to understanding the mental state of others (Li et al., 2014).

Interactions between these networks are related to everyday self-regulation (Krönke et al., 2020) and empathy for others (Acevedo et al., 2014; Bilevicius et al., 2018; Kim et al., 2017; Nummenmaa et al., 2008; Shamay-Tsoory et al., 2009). However, to the best of our knowledge, no research deals with the relationship between brain structure and function centered on these triple networks and understanding of diversity such as gender and LGBTQ. Therefore, in this study, by combining the GM-BHQ, which is a brain health index, and the psychological index related to acceptance of diversity, we investigated the structure of the brain centered on the triple network of people who accept diversity and those who do not. We would like to clarify the above differences and contribute to the development of diversity research in brain science and social science.

## Method

In this study, to clarify the differences in the acceptability of diversity and brain structure, we obtained a psychological index related to diversity and a brain health index, GM-BHQ, obtained by MRI image analysis. GM-BHQ was acquired between October and November 2023 after the approval by the Tokyo Institute of Technology's ethical committee for "Brain information cloud (research ethics review committee for human subjects: permission number 2019007)".

*Participants* We contacted 113 participants from whom we had acquired MRI data before by e-mail from April to May 2023. After that, we voluntarily asked them to cooperate with answering a questionnaire about diversity. There were 22 people (M: 20 people, F: 2 people) who participated in the questionnaire, and the average age was  $47.6 \pm 12.7$  years old.

*Questionnaire items* Gender and LGBTQ questions from the World Value Survey WAVE7 (Haerpfer, C. et al., 2022), which collects information on the values and beliefs of people around the world were extracted. As gender often raises issues in political and economic contexts (Elias and Rai, 2019), two related questions were used. Regarding LGBTQ, we considered that one of the three questions, "Same-sex couples can be good parents in the same way as heterosexual couples," was related to the legal system of the country and deviated from the purpose of this study, which focused on individual acceptance. Therefore, we used two question items other than this question. Below are the four questions that were finally selected.

Gender:

(i) To what extent do you agree or disagree with the following opinions? "In general, men are better suited as political leaders than women." 1: Strongly agree to 4: Strongly disagree, 5: Don't know (Q29)

(ii) How much do you agree or disagree with the following opinions? "When a wife earns more than her husband, problems always arise." 1: Strongly agree - 5: Strongly disagree, 6: Don't know (Q35)

LGBTQ:

(iii) Are there any of the following people you wouldn't want in your neighborhood? [Homosexual] 1: I don't want to live in the neighborhood ~ 6: I can live in the neighborhood (Q22)

(iv) What do you think about homosexuality? Do you think it is completely correct (acceptable) or completely wrong (not acceptable)? 1: Completely wrong (not acceptable) to 10: Completely correct (acceptable) (Q182)

Regarding questions (iii) and (iv), we have revised the question-and-answer items of the World Values Survey in line with this research. Specifically, for question (iii), the World Values Survey provides two responses: "1: I do not want to live in the neighborhood" and "2: It is OK to live in the neighborhood." To extract more detailed differences in acceptability, this study was set with a 6-point method. In addition, regarding question (iv), since the World Values Survey has multiple response items including homosexuality, the question was "What do you think about each of the following?" However, in this study, as only homosexuality was extracted, the question content was adjusted as above.

*Calculation of  $\Delta$ GM-BHQ* GM-BHQ is a standardized index of brain gray matter volume calculated from T1-weighted images with an average of 100 and a standard deviation of 15 (Nemoto et al., 2017). It has been approved as an international standard by the standardization organization ITU-T as a "numerical

index representing the physical characteristics of the brain that indicate health-related conditions" (approval number: ITU-TH.861.0). See Nemoto et al. (2017) for details of the GM-BHQ estimation method.

Previous studies have shown that GM-BHQ can be predicted by multiple regression using age, gender, and BMI as variables (Nemoto et al., 2017). Based on this, we created a multiple regression equation with age, gender, and BMI as independent variables and GM-BHQ as dependent variables from the data of 113 people, and calculated the difference between the predicted GM-BHQ value from the equation and the actual GM-BHQ value, that is,  $\Delta$ GM-BHQ. By using  $\Delta$ GM-BHQ, we compare participants' brain health and gender-LGBTQ understanding controlling for the effects of age, gender, and BMI.

Previous studies have shown that GM-BHQ at the whole-brain level was positively correlated with curiosity and perseverance (Kokubun et al., 2020), behavioral activation and empathic concern, and self-monitoring (Kokubun et al., 2022), and cognitive ability (Watanabe et al., 2021), and negatively correlated with fatigue and stress (Kokubun et al., 2018), an unbalanced diet (Kokubun and Yamakawa, 2019), and an unhealthy lifestyle (Kokubun et al., 2021). Longitudinal studies have shown that olfactory training (Watanabe et al., 2023) enhances GM-BHQ.

*Analysis method* This study tested the hypothesis that people who are more inclusive about gender and LGBTQ have higher GM-BHQ values. To that end, we first selected people who showed a high degree of acceptance regarding gender and LGBTQ in the four-questionnaire shown above. Specifically, regarding questions on gender, we extracted the respondents who chose either "4: Strongly Disagree" or "3: Disagree" for question i, and "5: Strongly Disagree" or "4: Disagree" for question ii. Regarding LGBTQ, we extracted those who selected "6: It's OK to live in the neighborhood" for question iii and "10: Completely correct (acceptable)" for question iv. Next, a one-sample t-test was performed to confirm whether the mean value of  $\Delta$ GM-BHQ in the extracted group with high acceptability was greater than zero. As evaluation targets, in addition to whole brain  $\Delta$ GM-BHQ, we analyzed regional  $\Delta$ GM-BHQ (CEN, SN, DMN), which are subscales of GM-BHQ.

## Result

Of the 22 participants in this study, one had type 1 diabetes. Because several previous studies have shown an association between diabetes and brain atrophy (Hansen et al., 2022; Ferguson, S. C., et al., 2005), the data for this one subject were excluded. Based on the method above, people with a high degree of gender and LGBTQ receptivity were extracted, 17 people were in the highly receptive group for gender and 9 people were in the highly receptive group for LGBTQ. In the figure 1, the results of a one-sample t-test were shown on the average  $\Delta$ GM-BHQ values for the whole brain and for each region in these high receptive groups.

*Whole Brain BHQ (overall brain health)* For  $\Delta$ GMBHQ in the whole brain, the gender-high receptivity group had an average value of 2.09 (SD = 4.50), which was not significant but relatively higher than 0 ( $t = -1.86$ ,  $p = 0.08$ , Cohen's  $d = 0.46$ ). In addition, in the LGBTQ highly receptive group, the mean value (SD = 4.29) was significantly higher than the baseline value of 0 ( $t = -3.03$ ,  $p = 0.02$ , Cohen's  $d = 1.07$ ).

*Region-specific BHQ (brain health level by region)*  $\Delta$ GM-BHQ by site showed a level significantly higher than 0 only in the CEN in the gender receptive group, with an average value of 3.25 (SD = 3.90) ( $t = -3.33$ ,  $p = 0.004$ , Cohen's  $d = 0.83$ ). Mean values were 3.62 (SD = 7.72) and 1.71 (SD = 5.61) in SN

and DMN, respectively (SN:  $t = -1.87$ ,  $p = 0.08$ , Cohen's  $d = 0.47$ , DMN:  $t = -1.22$ ,  $p = 0.242$ , Cohen's  $d = 0.30$ ). On the other hand, in the LGBTQ highly receptive group,  $\Delta$ GMBHQ was significantly higher than 0 in all three regions of CEN, SN, and DMN, with mean values of 4.73 (SD = 4.45), 7.63 (SD = 7.24), and 5.60 (SD = 7.24), respectively. 4.63) (CEN:  $t = 3.00$ ,  $p = 0.020$ , Cohen's  $d = 1.06$ , SN:  $t = -2.98$ ,  $p = 0.020$ , Cohen's  $d = 1.05$ , DMN:  $t = -3.42$ ,  $p = 0.011$ , Cohen's  $d = 1.21$ ).

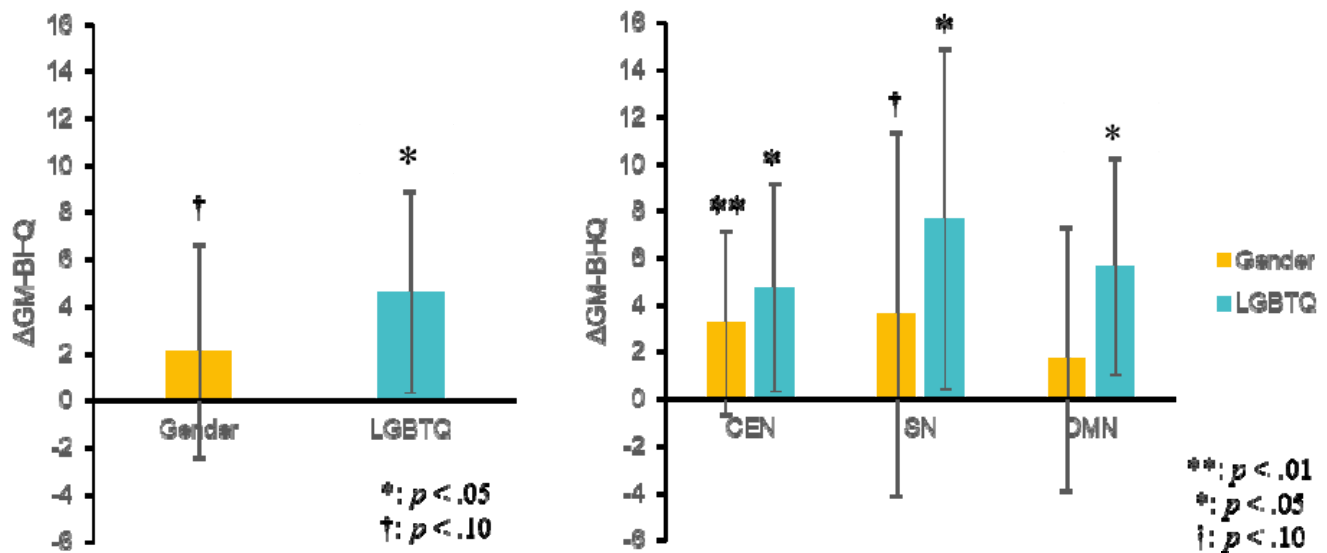

Figure 1. GM-BHQ and Gender/LGBTQ Awareness

(Whole brain on the left, subscale on the right)

## Discussion

This study showed that people with a high understanding of gender equality had a significantly higher CEN and a relatively higher SN GM-BHQ than the values estimated from age, gender, and BMI. On the other hand, it was shown that not only CEN, but also SN, DMN, and whole-brain GM-BHQ were significantly higher than the estimated values for those with a high understanding of LGBT. This can be said to indicate that the health level of the CEN area related to cognitive control is important to accept both gender and LGBT. The CEN region is a brain region related to working memory and rational judgment, such as the dorsolateral prefrontal cortex and the superior parietal lobule, and it is thought that these brain functions need to work soundly for a good understanding of gender (Fox et al., 2007; Goldberg et al., 2006; Koechlin and Summerfield, 2007; Miller and Cohen, 2001; Owen et al., 2005; Smith and Jonides, 1998; Wager and Smith, 2003).

In addition, the analysis results show that, especially for LGBTQ people, in addition to the CEN, the health level of the SN, which is responsible for the external monitoring function, and the DMN, which is closely related to sociality, is important. The SN region, which includes the insular cortex, anterior

cingulate gyrus, and paracingulate gyrus, is a brain region associated with emotional response and regulation (Cai et al., 2015; Chen et al., 2015; Goulden et al., 2014; Ham et al., 2013; Menon and Uddin, 2010; Sridharan et al., 2008; Uddin, 2015). Therefore, it can be said that brain health centered on the SN, which appropriately regulates emotions, is required to reduce prejudice against LGBTQ people. On the other hand, the DMN region includes the posterior cingulate gyrus, medial superior frontal gyrus, precuneus, angular gyrus, and orbital inferior frontal lobe (Andrews-Hanna et al., 2010; Buckner et al., 2008; Li et al., 2014; Shulman et al., 1997). This suggests that more than gender equality, fair attitudes toward LGBTQ people require more complex social judgments and, therefore, brain health centered on the DMN, which is related to sociality.

A previous study performed an independent component analysis (ICA) on resting brain activity and showed that emotional empathy scores correlated with functional connectivity in the CEN, SN, and DMN (Bilevicius et al., 2018). This result is consistent with empathy responses in previous studies using fMRI (Acevedo et al., 2014; Kim et al., 2017; Nummenmaa et al., 2008; Shamay-Tsoory et al., 2009), showing that emotional empathy involves movement, attention, and self-referential processing. Here, affective empathy refers to the ability to understand, infer, judge, and share the emotional experiences of others (Gallese, 2003; Shamay-Tsoory et al., 2009), and is important in social interaction (Baron-Cohen et al., 2001, Baron-Cohen and Wheelwright, 2004). As such, previous studies have shown that deficits in emotional empathy are associated with alcoholism (Maurage et al., 2011) and social anxiety disorder (Morrison et al., 2016).

Previous research also indicates that CEN, SN, and DMN are uniquely associated with empathy. fMRI experiments showed that both empathetic and permissive judgments activate the superior frontal gyrus that spans the CEN and DMN (Farrow et al., 2001). The superior frontal gyrus is thought to contribute to cognitive functions such as self-awareness (Goldberg et al., 2006) and working memory (WM) in conjunction with the action of the sensory system (Alagapan et al. 2019; Boisgueheneuc et al., 2006). This suggests that empathy activates specific brain regions and contributes to social cohesion (Farrow et al., 2001). Similarly, studies on racial bias show that activation of regions of the frontal cortex associated with control and regulation modulates amygdala activity, thereby suppressing racist emotions. (Banaji et al., 2008). Also, some fMRI studies suggest that the lack of empathy is primarily due to a defective SN switching function. Dysfunctional SNs are involved in the activation of the DMN, which leads to self-focused attention and empathy disorders such as narcissism (Jankowiak-Siuda and Zajkowski, 2013). Furthermore, the AIs and dACCs that make up the SN have been associated with empathy themselves (Fallon et al., 2020; Gu et al., 2010; Timmers et al., 2018).

Alternatively, data-driven quantitative reasoning studies suggest that SN and CEN facilitate individuals to build long-term social relationships through emotional processing and cognitive control and that DMN facilitates individuals to develop long-term social relationships through mentalizing processes. It has been suggested that it predicts the experiences, beliefs, and intentions of others and facilitates interaction (Li et al., 2022). In particular, DMN has been implicated in both functional and structural studies as prosocial personality traits such as extraversion and agreeableness (Mars et al., 2012; Sampaio et al., 2014; Coutinho et al., 2013), and it is associated with self-cognitive empathy (Silva et al., 2018; Esménio et al., 2019). On the other hand, a recent systematic review shows that people with low compassion tend to have either low reward-related neuronal area activity or gray matter volume (Novak et al., 2022). Consistent with this, our previous studies have shown that whole-brain gray matter is positively correlated with psychological variables representing behavioral activation, empathic concern, and self-monitoring (Kokubun et al., 2022).

This series of previous studies provides compelling reasons why CEN is required for understanding gender, and why a triple network consisting of CEN, SN, and DMN is required for understanding LGBTQ. First, women make up half of Japan's population and are familiar to men. In a survey in which managers of companies with diversity management strategies were asked, "What are the benefits obtained by accepting diversity?", the following effects were confirmed. "Acquisition of human resources", "Improvement of performance", "Enhancement of brand power and reputation", "Vitalization of innovation", etc. (Ministry of Economy, Trade and Industry, 2020). Alternatively, research on the relationship between women's participation in parliament and the economy shows that a 10-percentage point increase in women's representation in parliament leads to a 0.74 percentage point increase in GDP growth (Mirziyoyeva and Salahodjaev, 2023). Furthermore, items such as "degree of freedom of choice in life" and "tolerance" are pushing down the level of happiness in Japan. A study also found a statistically significant correlation (correlation coefficient 0.486 in 124 countries) between the gender gap index and subjective well-being. Therefore, it is an important time for business and political leaders to embrace diverse perspectives, not only for the social contribution reasons that have been thought of so far, but also to strengthen the profit structure of the economy at the corporate and national level, and to increase the happiness of the people. In this situation, increasing diversity is one of the rational decisions necessary to demonstrate high performance and increase happiness. Our results are convincing, showing that gender understanding was most strongly associated with CEN, which governs attention and decision-making.

On the other hand, it is said that 8.9% of the population of Japan is LGBTQ, and it is difficult to recognize them as a familiar existence. As a result, in the above survey results, the most common group in Japan is the "knowledgeable other people (34.1%): people who maintain the status quo who have knowledge but do not have the opportunity to feel a sense of challenge because they are not familiar with the person concerned." Therefore, unfortunately, it is true that prejudice against LGBTQ still exists. This means that it is necessary to have the ability to "imagine and consider the feelings of minorities" to understand LGBTQ. In other words, it is thought that people with a high degree of understanding of LGBTQ have an inclusive mindset by simultaneously using their rational judgment and the ability to consider others who are not close to them. By the way, sympathy for LGBTQ by activating the triple network of CEN plus SN and DMN is extremely important in the realization of design thinking and art thinking, which have been important in the business world for about 10 years. Design thinking requires both the ability to design based on empathy for a variety of things and the ability to think logically to construct a business model. This is exactly the domain of the triple network. Therefore, judging from the results of this analysis, it can be surmised that people with a high degree of understanding of diversity are likely to have high potential as business people and managers.

This study is the first to show that brain health centered on the triple network is necessary for understanding diversity such as gender and LGBTQ, contributing to the development of diversity research in brain science and social science.

### Limitation

The small sample size casts doubt on the robustness of the results. Future studies should validate this study by performing similar studies with larger sample sizes. In addition, the cross-sectional analysis showed a correlation, not a causal relationship between variables. In the future, the method of longitudinal analysis should be adopted to verify the results of this study.

## Conclusion

In this study, analysis was performed using the brain health index GM-BHQ obtained by MRI image analysis and the results of a psychological questionnaire. As a result, people with a high understanding of diversity such as gender and LGBTQ had a healthy brain centered on the triple network consisting of CEN, SN, and DMN compared to the values estimated from age, gender, and BMI.

## References

- Acevedo BP, Aron EN, Aron A, Sangster MD, Collins N, Brown LL The highly sensitive brain: an fMRI study of sensory processing sensitivity and response to others' emotions. *Brain Behav.* 2014; 4(4): 580-594. <https://doi.org/10.1002/brb3.242>
- Alagapan S, Lustenberger C, Hadar E, Shin HW, Fröhlich F. Low-frequency direct cortical stimulation of left superior frontal gyrus enhances working memory performance. *Neuroimage.* 2019; 184: 697-706. <https://doi.org/10.1016/j.neuroimage.2018.09.064>
- Andrews-Hanna JR, Reidler JS, Sepulcre J, Poulin R, Buckner RL Functional-anatomic fractionation of the brain's default network. *Neuron.* 2010; 65: 550–562. <https://doi.org/10.1016/j.neuron.2010.02.005>
- Banaji MR, Baron AS, Dunham Y, Olson K. The development of intergroup social cognition. In: Levy SR, Killen M, editors. *Intergroup attitudes and relations in childhood through adulthood.* New York: Oxford University Press; 2008. pp. 87-102.
- Baron-Cohen S, Wheelwright S. The empathy quotient: an investigation of adults with Asperger syndrome or high functioning autism, and normal sex differences. *J Autism Dev Disord.* 2004; 34: 163-175. <https://doi.org/10.1023/B:JADD.0000022607.19833.00>
- Baron-Cohen S, Wheelwright S, Hill J, Raste Y, Plumb I. The “Reading the Mind in the Eyes” Test revised version: a study with normal adults, and adults with Asperger syndrome or high-functioning autism. *J Child Psychol Psychiatry.* 2001; 42(2): 241-251. <https://doi.org/10.1017/S0021963001006643>
- Bilevicius E, Kolesar TA, Smith SD, Trapnell PD, Kornelsen J. Trait emotional empathy and resting state functional connectivity in default mode, salience, and central executive networks. *Brain Sci.* 2018; 8(7): 128. <https://doi.org/10.3390/brainsci8070128>
- Boisgueheneuc FD, Levy R, Volle E, Seassau M, Duffau H, Kinkingnehun, S, et al. Functions of the left superior frontal gyrus in humans: a lesion study. *Brain.* 2006; 129(12): 3315-3328. <https://doi.org/10.1093/brain/awl244>
- Buckner RL, Andrews-Hanna JR, Schacter DL. The brain's default network - anatomy, function, and relevance to disease. *Ann NY Acad Sci.* 2008; 1124: 1–38. <https://doi.org/10.1196/annals.1440.011>
- Bush G, Luu P, Posner MI. Cognitive and emotional influences in anterior cingulate cortex. *Trends Cogn Sci.* 2000; 4(6): 215-222. [https://doi.org/10.1016/S1364-6613\(00\)01483-2](https://doi.org/10.1016/S1364-6613(00)01483-2)
- Cai W, Chen T, Ryali S, Kochalka J, Li CSR Menon V. Causal interactions within a frontal-cingulate-parietal network during cognitive control: Convergent evidence from a multisite-multitask investigation. *Cereb Cortex.* 2016; 26(5): 2140-2153. <https://doi.org/10.1093/cercor/bhv046>
- Carter CS, Braver TS, Barch DM, Botvinick MM, Noll D, Cohen, JD. Anterior cingulate cortex, error detection, and the online monitoring of performance. *Science.* 1998; 280(5364): 747-749. <https://doi.org/10.1126/science.280.5364.747>
- Craig AD. How do you feel—now? The anterior insula and human awareness. *Nat Rev Neurosci.* 2009; 10(1): 59-70. <https://doi.org/10.1038/nrn2555>



- Chen T, Michels L, Supekar K, Kochalka J, Ryali S, Menon V. Role of the anterior insular cortex in integrative causal signaling during multisensory auditory–visual attention. *Eur J Neurosci*. 2015; 41(2), 264-274. <https://doi.org/10.1111/ejn.12764>
- Coutinho JF, Sampaio A, Ferreira M, Soares JM, Gonçalves OF. Brain correlates of pro-social personality traits: a voxel-based morphometry study. *Brain Imaging Behav*. 2013; 7, 293-299. <https://doi.org/10.1007/s11682-013-9227-2>
- Critchley HD, Wiens S, Rotshtein P, Öhman A, Dolan RJ. Neural systems supporting interoceptive awareness. *Nat Neurosci*. 2004; 7(2), 189-195. <https://doi.org/10.1038/nn1176>
- Elias J, Rai SM. Feminist everyday political economy: Space, time, and violence. *Rev Int Stud*. 2019; 45(2), 201-220. <https://doi.org/10.1017/S0260210518000323>
- Esménio S, Soares JM, Oliveira-Silva P, Zeidman P, Razi A, Gonçalves ÓF, et al. Using resting-state DMN effective connectivity to characterize the neurofunctional architecture of empathy. *Sci Rep*. 2019; 9(1), 2603. <https://doi.org/10.1038/s41598-019-38801-6>
- Fallon N, Roberts C, Stancak A. Shared and distinct functional networks for empathy and pain processing: a systematic review and meta-analysis of fMRI studies. *Soc Cogn Affect Neurosci*. 2020; 15(7), 709-723. <https://doi.org/10.1093/scan/nsaa090>
- Farrow TF, Zheng Y, Wilkinson ID, Spence SA, Deakin JW, Tarrier N, et al. Investigating the functional anatomy of empathy and forgiveness. *Neuroreport*. 2001; 12(11), 2433-2438. <https://doi.org/10.1097/00001756-200108080-00029>
- Ferguson SC, Blane A, Wardlaw J, Frier BM, Perros P, McCrimmon RJ et al. Influence of an early-onset age of type 1 diabetes on cerebral structure and cognitive function. *Diabetes Care*. 2005; 28(6), 1431-1437. <https://doi.org/10.2337/diacare.28.6.1431>
- Fox MD, Corbetta M, Snyder AZ, Vincent JL, Raichle ME. Spontaneous neuronal activity distinguishes human dorsal and ventral attention systems. *Proc Natl Acad Sci U S A*. 2006; 103(26), 10046-10051. <https://doi.org/10.1073/pnas.0604187103>
- Gallese, V. The roots of empathy: the shared manifold hypothesis and the neural basis of intersubjectivity. *Psychopathology*. 2003; 36(4), 171-180. <https://doi.org/10.1073/pnas.0604187103>
- Gamberini M, Passarelli L, Filippini M, Fattori P, Galletti C. Vision for action: Thalamic and cortical inputs to the macaque superior parietal lobule. *Brain Struct Funct*. 2021; 226(9), 2951–2966. <https://doi.org/10.1007/s00429-021-02377-7>
- García JJ. Heart, brain and mental health disparities for LGBTQ people of color. Palgrave Macmillan; 2021.
- Goldberg I, Harel M, Malach R. When the brain loses its self: prefrontal inactivation during sensorimotor processing. *Neuron*. 2006; 50(2), 329–39. <https://doi.org/10.1016/j.neuron.2006.03.015>
- Goulden N, Khusnulina A, Davis NJ, Bracewell RM, Bokde AL, McNulty JP, Mullins PG. The salience network is responsible for switching between the default mode network and the central executive network: replication from DCM. *Neuroimage*. 2014; 99, 180-190. <https://doi.org/10.1016/j.neuroimage.2014.05.052>
- Gruber O, Melcher T, Diekhof EK, Karch S, Falkai P, Goschke T. Brain mechanisms associated with background monitoring of the environment for potentially significant sensory events. *Brain Cogn*. 2009; 69(3), 559–564. <https://doi.org/10.1016/j.bandc.2008.11.00819135767>
- Gu X, Liu X, Guise KG, Naidich TP, Hof PR, Fan J. Functional dissociation of the frontoinsula and anterior cingulate cortices in empathy for pain. *J. Neurosci*. 2010; 30(10), 3739-3744. <https://doi.org/10.1523/JNEUROSCI.4844-09.2010>
- Ham T, Leff A, de Boissezon X, Joffe A, Sharp DJ. Cognitive control and the salience network: an investigation of error processing and effective connectivity. *J. Neurosci*. 2013; 33(16), 7091-7098. <https://doi.org/10.1523/JNEUROSCI.4692-12.2013>

- Hansen TM, Muthulingam JA, Brock B, Drewes AM, Juhl A, Vorum H et al. Reduced gray matter brain volume and cortical thickness in adults with type 1 diabetes and neuropathy. *Neurosci Res.* 2022; 176, 66-72. <https://doi.org/10.1016/j.neures.2021.10.002>
- Haerpfer C, Inglehart R, Moreno A, Welzel C, Kizilova K, Diez-Medrano J et al. World values survey: round seven - country-pooled datafile version 5.0. Madrid, Spain & Vienna, Austria: JD Systems Institute & WWSA Secretariat; 2022. <https://doi.org/10.14281/18241.20>
- Jankowiak-Siuda K, Zajkowski W. A neural model of mechanisms of empathy deficits in narcissism. *Med Sci Monit.* 2013; 19, 934. <https://doi.org/10.12659/MSM.889593>
- Kim SJ, Kim SE, Kim HE, Han K, Jeong B, Kim JJ et al. Altered functional connectivity of the default mode network in low-empathy subjects. *Yonsei Med J.* 2017; 58(5), 1061-1065. <http://dx.doi.org/10.3349/ymj.2017.58.5.1061>
- Kircher TT, Brammer M, Bullmore E, Simmons A, Bartels M, David AS. The neural correlates of intentional and incidental self processing. *Neuropsychologia.* 2002; 40(6), 683–692. [https://doi.org/10.1016/S0028-3932\(01\)00138-5](https://doi.org/10.1016/S0028-3932(01)00138-5)
- Kircher TT, Senior C, Phillips ML, Benson PJ, Bullmore ET, Brammer M et al. Towards a functional neuroanatomy of self processing: effects of faces and words. *Cogn Brain Res.* 2000; 10(1–2), 133–144. [https://doi.org/10.1016/S0926-6410\(00\)00036-7](https://doi.org/10.1016/S0926-6410(00)00036-7)
- Koechlin E, Summerfield, C. An information theoretical approach to prefrontal executive function. *Trends Cogn Sci.* 2007; 11(6), 229-235. <https://doi.org/10.1016/j.tics.2007.04.005>
- Koenigs M, Barbey AK, Postle BR, Grafman J. Superior parietal cortex is critical for the manipulation of information in working memory. *J Neurosci.* 2009; 29(47), 14980–6. <https://doi.org/10.1523/JNEUROSCI.3706-09.2009>
- Kokubun K, Nemoto K, Oka H, Fukuda H, Yamakawa Y, Watanabe Y. Association of fatigue and stress with gray matter volume. *Front Behav Neurosci.* 2018; 12, 154. <https://doi.org/10.3389/fnbeh.2018.00154>
- Kokubun K, Pineda JCD, Yamakawa Y. Unhealthy lifestyles and brain condition: Examining the relations of BMI, living alone, alcohol intake, short sleep, smoking, and lack of exercise with gray matter volume. *Plos one.* 2021; 16(7), e0255285. <https://doi.org/10.1371/journal.pone.0255285>
- Kokubun K, Yamakawa Y. Association between food patterns and gray matter volume. *Front Hum Neurosci.* 2019; 13, 384. <https://doi.org/10.3389/fnhum.2019.00384>
- Kokubun K, Yamakawa Y, Hiraki K. Association between behavioral ambidexterity and brain health. *Brain Sci.* 2020; 10(3), 137. <https://doi.org/10.3390/brainsci10030137>
- Kokubun K, Yamakawa Y, Nemoto K. The link between the brain volume derived index and the determinants of social performance. *Curr. Psychol.* 2022; a-head-of-print. <https://doi.org/10.1007/s12144-021-02544-3>
- Krönke KM, Wolff M, Shi Y, Kräplin A, Smolka MN, Bühringer G et al. Functional connectivity in a triple-network saliency model is associated with real-life self-control. *Neuropsychologia.* 2020; 149, 107667. <https://doi.org/10.1016/j.neuropsychologia.2020.107667>
- Lamm C, Decety J, Singer T. Meta-analytic evidence for common and distinct neural networks associated with directly experienced pain and empathy for pain. *NeuroImage.* 2011; 54(3), 2492–2502. <https://doi.org/10.1016/j.neuroimage.2010.10.014>
- Lanz K, Brown P. All the brains in the business: the engendered brain in the 21st century organisation (The neuroscience of business), Palgrave Macmillan; 2019. <https://doi.org/10.1007/978-3-030-22153-9>
- Li W, Mai X, Liu C. The default mode network and social understanding of others: what do brain connectivity studies tell us. *Front. Hum. Neurosci.* 2014; 8, 74. <https://doi.org/10.3389/fnhum.2014.00074>

- Li T, Pei Z, Zhu Z, Wu X, Feng C. Intrinsic brain activity patterns across large-scale networks predict reciprocity propensity. *Hum Brain Mapp.* 2022; 43(18), 5616-5629. <https://doi.org/10.1002/hbm.26038>
- Mars RB, Neubert FX, Noonan MP, Sallet J, Toni I, Rushworth MF. On the relationship between the “default mode network” and the “social brain”. *Front Hum Neurosci.* 2012; 6, 189. <https://doi.org/10.3389/fnhum.2012.00189>
- Maurage P, Grynberg D, Noël X, Joassin F, Philippot P, Hanak C et al. Dissociation between affective and cognitive empathy in alcoholism: a specific deficit for the emotional dimension. *Alcohol Clin Exp Res.* 2011; 35(9), 1662-1668. <https://doi.org/10.1111/j.1530-0277.2011.01512.x>
- Menon B. Towards a new model of understanding—The triple network, psychopathology and the structure of the mind. *Med. Hypotheses.* 2019; 133, 109385. <https://doi.org/10.1016/j.mehy.2019.109385>
- Menon V, Uddin LQ. Saliency, switching, attention and control: a network model of insula function. *Brain Struct Funct.* 2010; 214, 655-667. <https://doi.org/10.1007/s00429-010-0262-0>
- Miller EK, Cohen JD. An integrative theory of prefrontal cortex function. *Annu Rev Neurosci.* 2001; 24(1), 167-202. <https://doi.org/10.1146/annurev.neuro.24.1.167>
- Ministry of Economy, Trade and Industry. Diversity 2.0: One step ahead of competitive strategy. Economic and Social Policy Office, Economic and Industrial Policy Bureau, September 2020.
- Mirziyoyeva Z, Salahodjaev R. Does representation of women in parliament promote economic growth? Considering evidence from Europe and Central Asia. *Front Polit Sci.* 2023; 5, 1120287. <https://doi.org/10.3389/fpos.2023.1120287>
- Morrison AS, Mateen MA, Brozovich FA, Zaki J, Goldin PR, Heimberg RG et al. Empathy for positive and negative emotions in social anxiety disorder. *Behav Res Ther.* 2016; 87, 232-242. <https://doi.org/10.1016/j.brat.2016.10.005>
- Nemoto K, Oka H, Fukuda H, Yamakawa Y. MRI-based Brain Healthcare Quotients: A bridge between neural and behavioral analyses for keeping the brain healthy. *PLoS One.* 2017; 12(10), e0187137. <https://doi.org/10.1371/journal.pone.0187137>
- Novak L, Malinakova K, Mikoska P, van Dijk JP, Tavel P. Neural correlates of compassion—An integrative systematic review. *Int J Psychophysiol.* 2022; 172, 46-59. <https://doi.org/10.1016/j.ijpsycho.2021.12.004>
- Nummenmaa L, Hirvonen J, Parkkola R, Hietanen JK. Is emotional contagion special? An fMRI study on neural systems for affective and cognitive empathy. *NeuroImage.* 2008; 43(3), 571-580. <https://doi.org/10.1016/j.neuroimage.2008.08.014>
- Ochsner KN, Beer JS, Robertson ER, Cooper JC, Gabrieli JD, Kihlstrom JF et al. The neural correlates of direct and reflected self-knowledge. *NeuroImage.* 2005; 28(4), 797–814. <https://doi.org/10.1016/j.neuroimage.2005.06.069>
- Owen AM, McMillan KM, Laird AR, Bullmore E. N-back working memory paradigm: A meta-analysis of normative functional neuroimaging studies. *Hum Brain Mapp.* 2005; 25(1), 46-59. <https://doi.org/10.1002/hbm.20131>
- Rodríguez-Nieto G, Mercadillo RE, Pasaye EH, Barrios FA. Affective and cognitive brain-networks are differently integrated in women and men while experiencing compassion. *Front. Psychol.* 2022; 5693. <https://doi.org/10.3389/fpsyg.2022.992935>
- Sampaio A, Soares JM, Coutinho J, Sousa N, Gonçalves ÓF. The Big Five default brain: functional evidence. *Brain Struct. Funct.* 2014; 219, 1913-1922. <https://doi.org/10.1007/s00429-013-0610-y>
- Seeley WW, Menon V, Schatzberg AF, Keller J, Glover GH, Kenna H. et al. Dissociable intrinsic connectivity networks for salience processing and executive control. *J Neurosci.* 2007; 27(9), 2349-2356. <https://doi.org/10.1523/JNEUROSCI.5587-06.2007>

- Seth AK. Causal connectivity of evolved neural networks during behavior. *Netw: Comput Neural Syst.* 2005; 16(1), 35-54. <https://doi.org/10.1080/09548980500238756>
- Shamay-Tsoory SG, Aharon-Peretz J, Perry D. Two systems for empathy: a double dissociation between emotional and cognitive empathy in inferior frontal gyrus versus ventromedial prefrontal lesions. *Brain.* 2009; 132(3), 617-627. <https://doi.org/10.1093/brain/awn279>
- Shulman GL, Fiez JA, Corbetta M, Buckner RL, Miezin FM, Raichle ME et al. Common blood flow changes across visual tasks.2. Decreases in cerebral cortex. *J Cogn Neurosci.* 1997; 9, 648–663. <https://doi.org/10.1162/jocn.1997.9.5.648>
- Silva PO, Maia L, Coutinho J, Frank B, Soares JM, Sampaio A et al. Empathy by default: Correlates in the brain at rest. *Psicothema.* 2018; 30(1), 97-103.
- Smith EE, Jonides J. Neuroimaging analyses of human working memory. *Proc Natl Acad Sci U S A.* 1998; 95(20), 12061-12068. <https://doi.org/10.1073/pnas.95.20.12061>
- Sridharan D, Levitin DJ, Menon V. A critical role for the right fronto-insular cortex in switching between central-executive and default-mode networks. *Proc Natl Acad Sci U S A.* 2008; 105(34), 12569-12574. <https://doi.org/10.1073/pnas.0800005105>
- Stevens FL, Hurley RA, Taber KH. Anterior cingulate cortex: unique role in cognition and emotion. *J Neuropsychiatry Clin Neurosci.* 2011; 23(2), 121-125. <https://doi.org/10.1176/jnp.23.2.jnp121>
- Timmers I, Park AL, Fischer MD, Kronman CA, Heathcote LC, Hernandez JM et al. Is empathy for pain unique in its neural correlates? A meta-analysis of neuroimaging studies of empathy. *Front Behav Neurosci.* 2018; 12, 289. <https://doi.org/10.3389/fnbeh.2018.00289>
- Uddin LQ. Salience processing and insular cortical function and dysfunction. *Nat Rev Neurosci.* 2015; 16(1), 55-61. <https://doi.org/10.1038/nrn3857>
- Wager TD, Smith EE. Neuroimaging studies of working memory: a meta-analysis. *Cogn Affect Behav Neurosci.* 2003; 3, 255–274. <https://doi.org/10.3758/CABN.3.4.255>
- Watanabe K, Kakeda S, Nemoto K, Onoda K, Yamaguchi S, Kobayashi S, Yamakawa, Y. Grey-matter brain healthcare quotient and cognitive function: A large cohort study of an MRI brain screening system in Japan. *Cortex.* 2021; 145, 97-104. <https://doi.org/10.1016/j.cortex.2021.09.009>
- Watanabe K, Kokubun K, Yamakawa Y. Altered Grey Matter-Brain Healthcare Quotient: Interventions of Olfactory Training and Learning of Neuroplasticity. *Life.* 2023; 13(3), 667. <https://doi.org/10.3390/life13030667>
